# Supplementary material
Source: Springer Nature journal article supplement (https://www.springermedizin.de/resource/supplementary/12985_2014_2533_MOESM6_ESM.pdf/9606882)

**A**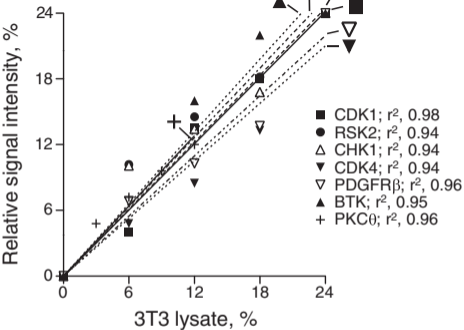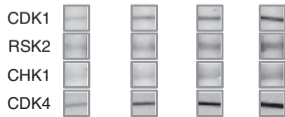**B**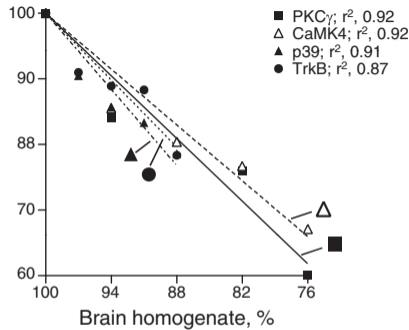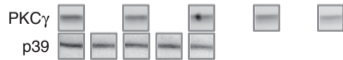

Supplement: MOESM6 [file 9606882]
